# Supplementary material for: Biosurfactants as Anticancer Agents: Glycolipids Affect Skin Cells in a Differential Manner Dependent on Chemical Structure
Source: MDPI journal article supplement (doi:10.3390/pharmaceutics14020360), 2022-02-04
Supplement: s1 [file s1]

# Supplementary Materials: Biosurfactants as Anti-cancer Agents: Glycolipids Affect Skin Cells in a Differential Manner Dependent on Chemical Structure

Simms A. Adu, Matthew S. Twigg, Patrick J. Naughton, Roger Marchant, and Ibrahim M. Banat

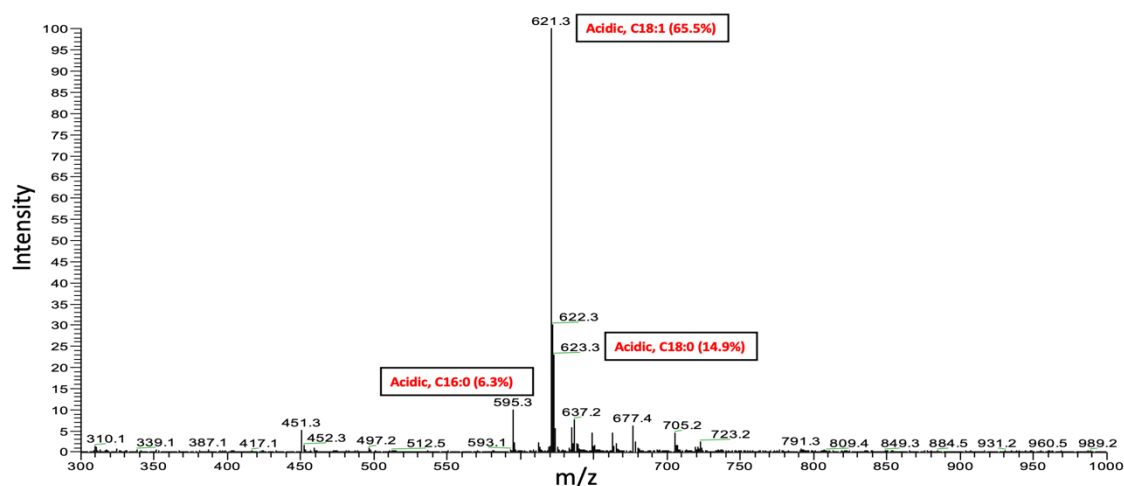

Acidic SL: LC-MS/ESI mass spectrum in negative ion mode

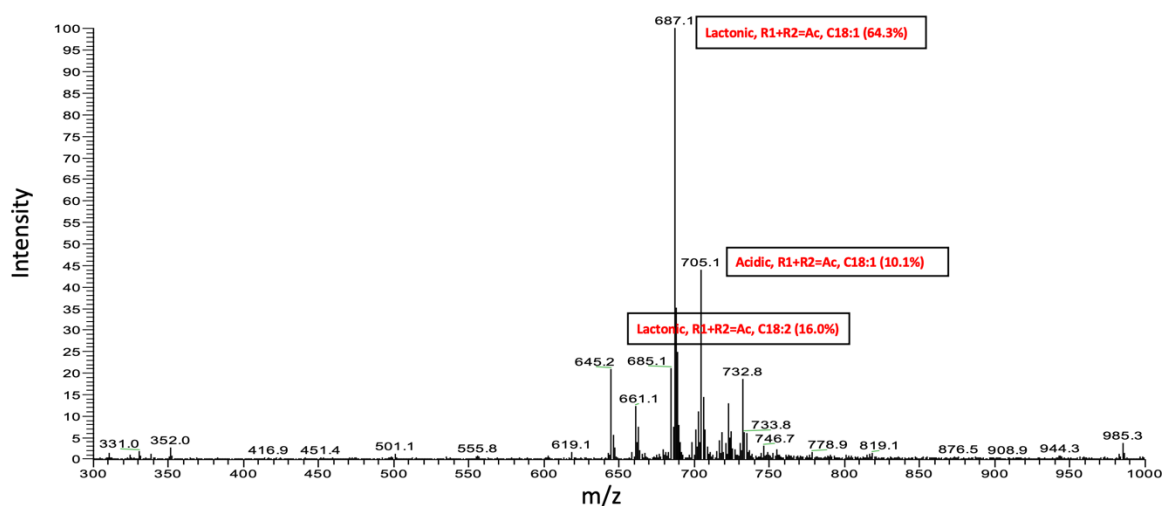

Lactonic SL: LC-MS/ESI mass spectrum in negative ion mode

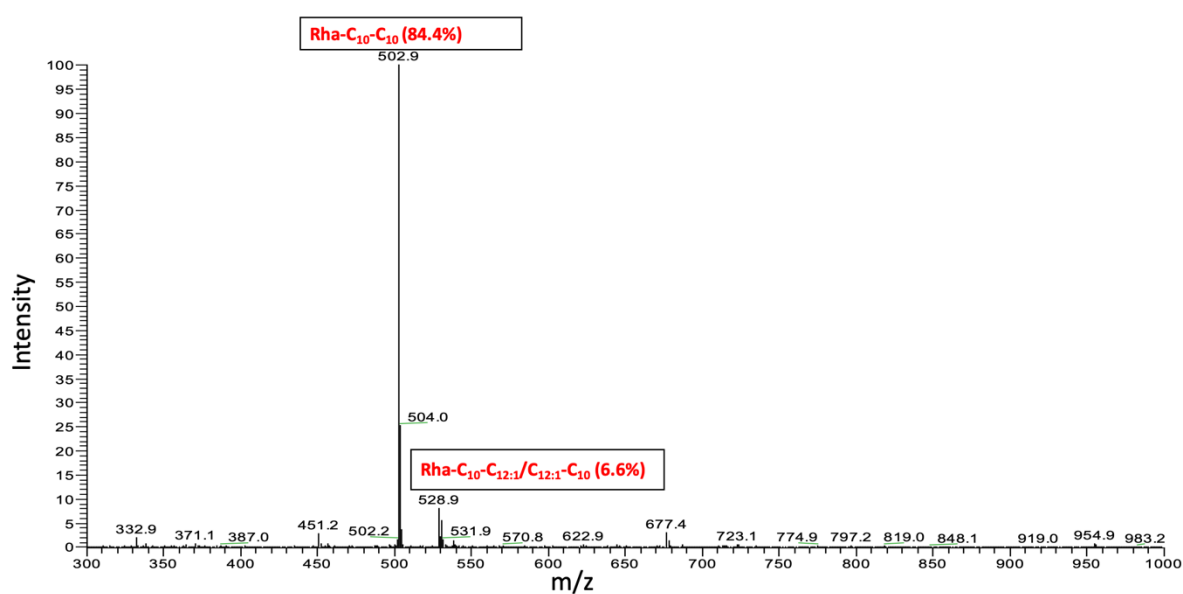

**Mono-RL: LC-MS/ESI mass spectrum in negative ion mode**

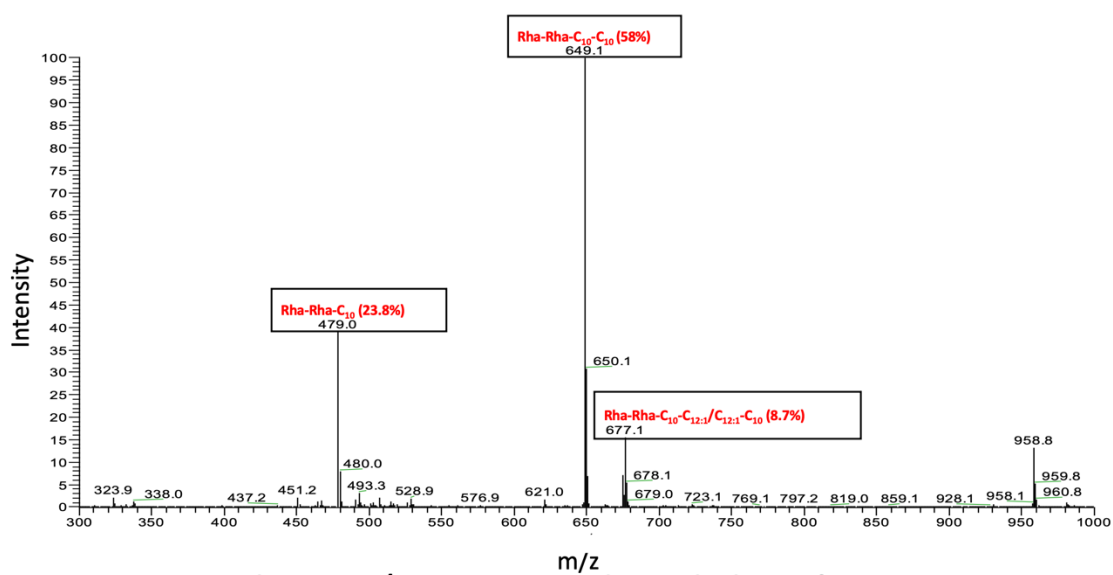

**Di-RL: LC-MS/ESI mass spectrum in negative ion mode**

**Figure S1.** HPLC-MS profile of each glycolipid preparation utilized in this study, (acidic sophorolipid, lactonic sophorolipid, mono-rhamnolipid and di-rhamnolipid), with predominant peaks identified.

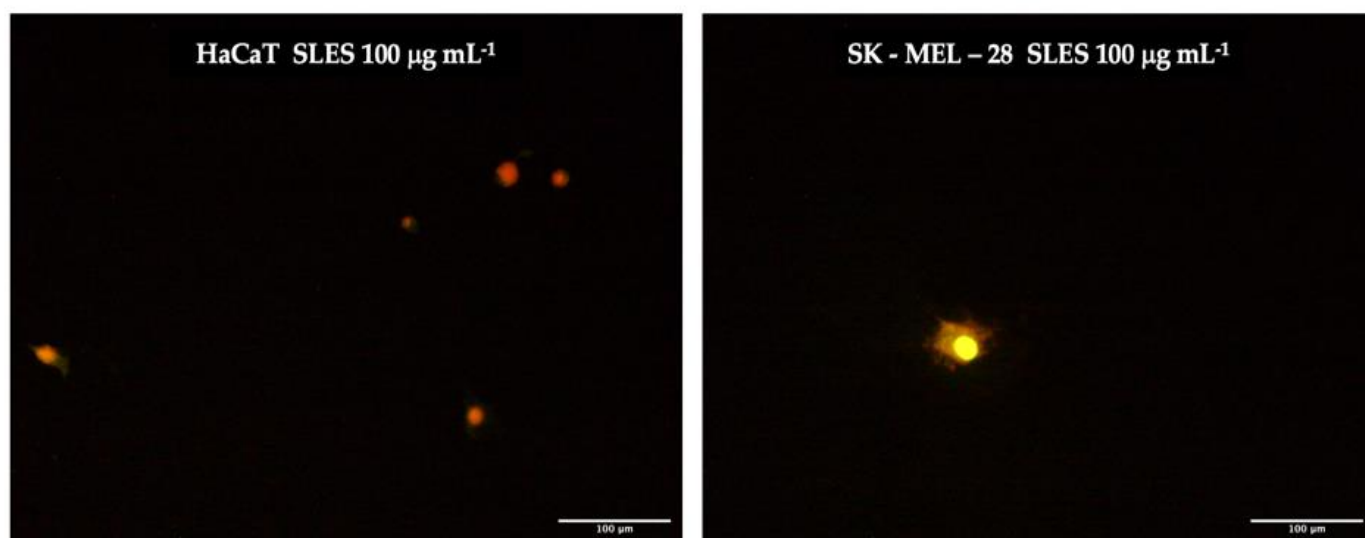

**Figure S2.** Morphological assessment of the pattern of cell death induced by glycolipids in HaCaT and SK-MEL- 28 cells using AO/PI staining following a 24 h treatment with SLES at 100  $\mu\text{g mL}^{-1}$
